# Supplementary material
Source: PubMed Central journal article supplement (PMC5777298)
Supplement: NIHMS930780-supplement.pdf [file NIHMS930780-supplement.pdf]

# Supplemental Information

## Calcium taste avoidance in *Drosophila*

Youngseok Lee, Seeta Poudel, Yunjung Kim, Dhananjay Thakur, and Craig Montell

**Figure S1 (Related to Figure 1)**

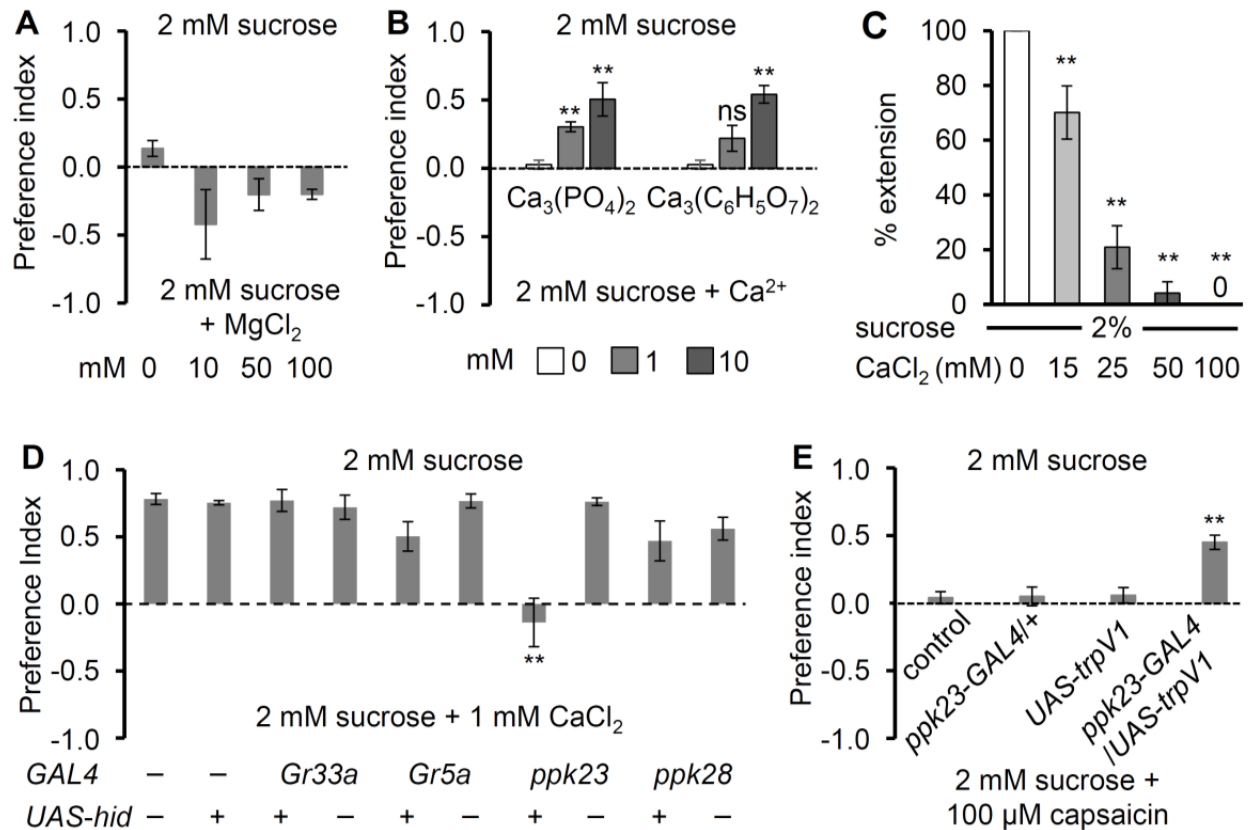

**Figure S1. Monitoring gustatory behavior using two-way choice and PER assays.**

(A) Two-way food choice assays performed with control flies. The animals were allowed to choose between 2 mM sucrose alone, and 2 mM sucrose mixed with the indicated MgCl<sub>2</sub> concentrations. n=4.

(B) Two-way food choice assays performed with control flies, using the indicated concentrations of calcium phosphite and calcium citrate. n=4.

(C) Proboscis extension response (PER) assays performed by applying 2% sucrose

and the indicated concentrations of  $\text{CaCl}_2$  to the labellum of control flies.  $n=4$ .

(D) Binary food choice assays were performed to determine the type of GRN required for  $\text{CaCl}_2$  avoidance. Different classes of GRNs were ablated by expressing a pro-apoptotic gene (*UAS-hid*) under the control of the *Gr33a-GAL4* (*Gr33a<sup>GAL4</sup>/+*), *Gr5a-GAL4*, *ppk23-GAL4*, or *ppk28-GAL4*.  $n=4$ .

(E) Testing the gustatory response to activation of *ppk23* GRNs by feeding capsaicin to *trpV1*-expressing flies. Binary food choice assays were performed after feeding  $100 \mu\text{M}$  capsaicin to the indicated flies.  $n=4$ . The error bars indicate SEMs. ANOVA tests with Scheffe's post hoc analyses. The comparisons were between: (A-C) control flies offered sucrose only, and (D-E) control flies without a *GAL4* or *UAS-hid*.  $**P < 0.01$ .

**Figure S2 (Related to Figure 3)**

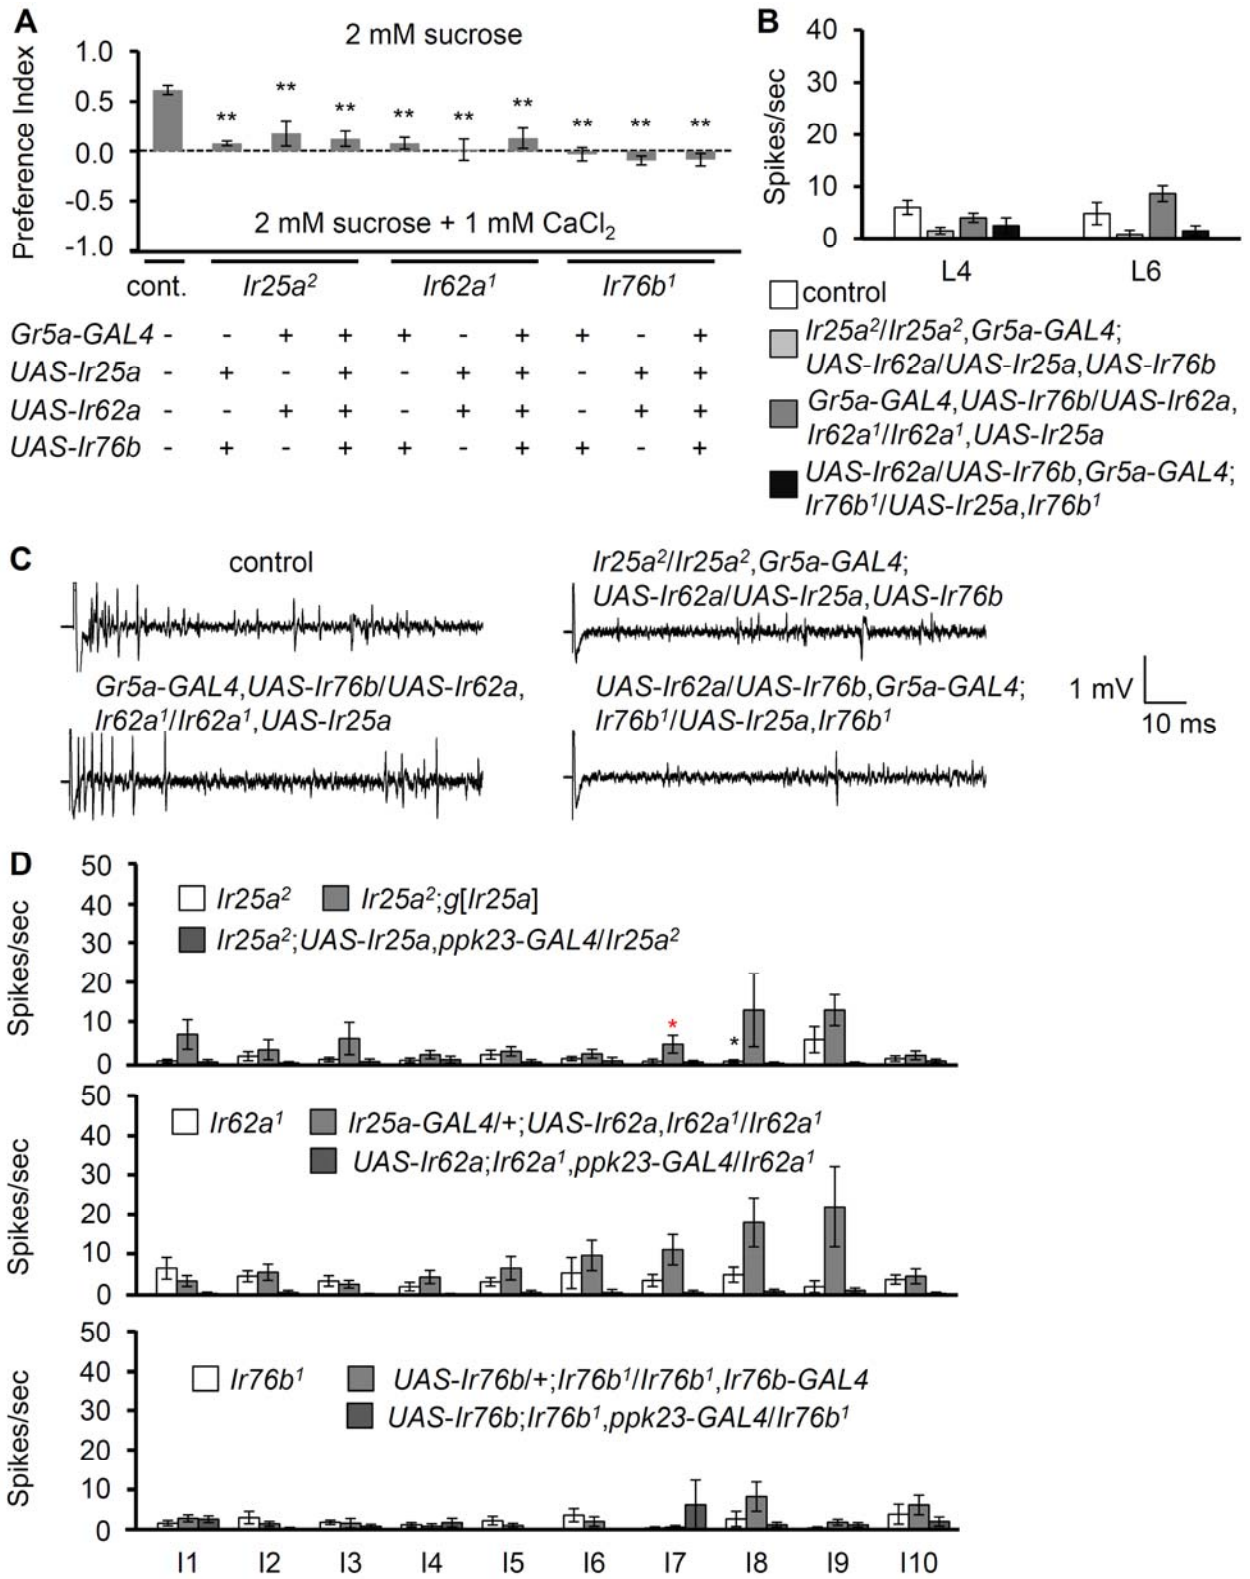

**Figure S2. Misexpression of *Ir25a*, *Ir62a* and *Ir76b* in sugar sensing GRNs and the  $\text{Ca}^{2+}$  response from I-type sensilla.**

(A—C) *UAS-Ir25a*, *UAS-Ir62a* and *UAS-Ir76b* were expressed in sugar-sensing GRNs using the *Gr5a-Gal4* in *Ir25a<sup>2</sup>*, *Ir62a* and *Ir76b<sup>1</sup>* mutant backgrounds. The flies were tested for acquisition of behavioral and electrophysiological responses to 50 mM  $\text{CaCl}_2$ . (A) Binary food choice feeding assays. n=4. (B) Tip recordings on L4, and L6 sensilla using 50 mM  $\text{CaCl}_2$  and the indicated flies. n=10. (C) Representative traces from L4 sensilla.

(D) Mean responses of the indicated I-type sensilla from the *Ir25a<sup>2</sup>*, *Ir62a<sup>1</sup>* or *Ir76b<sup>1</sup>* mutants, or the mutants expressing either the genomic rescue transgene (*g[Ir25a]*) or a *UAS-cDNA* rescue transgene under control of the indicated *GAL4s*. n=10—11. The error bars indicate SEMs. ANOVA tests with Scheffe's post hoc were analyzed to compare two sets of data. \*\* $P < 0.01$ .

**Figure S3 (Related to Figure 4)**

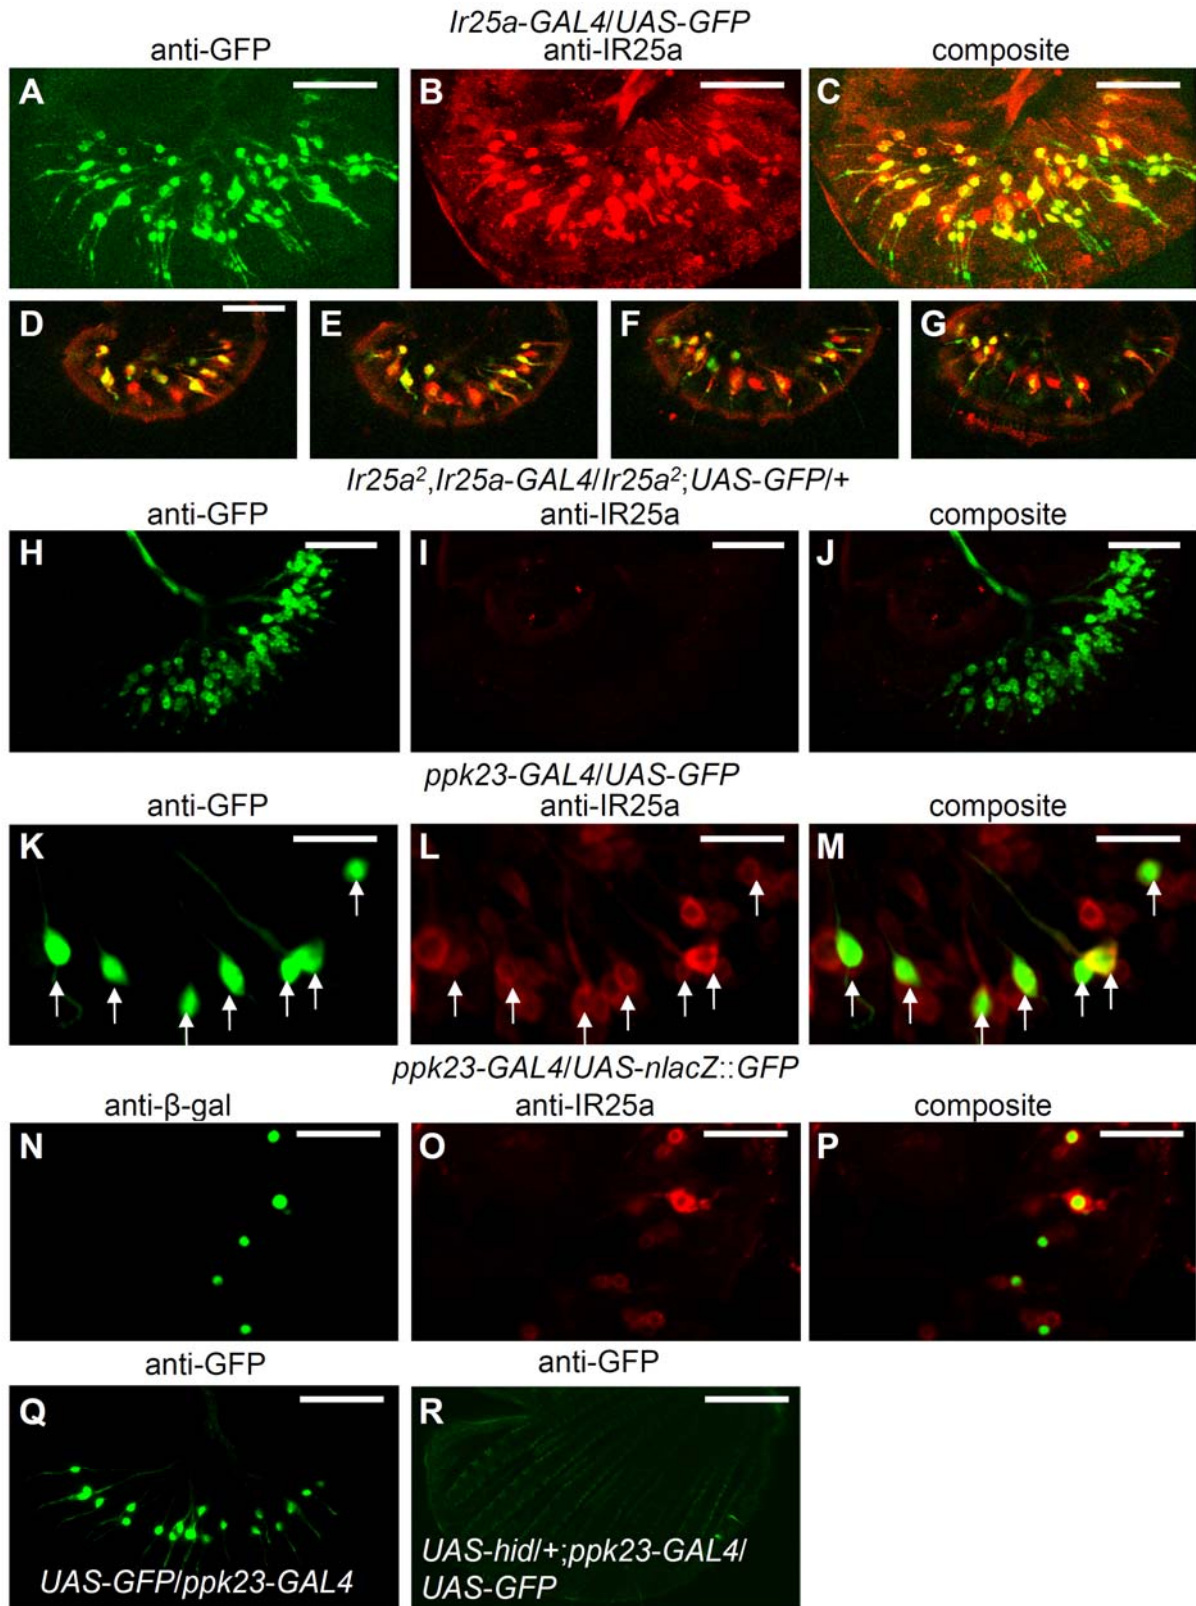

**Figure S3. Testing for co-localization of the *Ir25a-Gal4*, and the *ppk23-GAL4* reporters with anti-IR25a in the labellum.**

(A—C) Labella from *Ir25a-GAL4/UAS-GFP* flies were stained with: (A) anti-GFP and (B) anti-IR25a. (C) Merged images from A and B.

(D—G) A series of confocal sections from *Ir25a-GAL4/UAS-GFP* flies showing extensive overlap between anti-GFP (green) and anti-IR25a (red) staining.

(H—J) Loss of anti-IR25a staining in *Ir25a<sup>2</sup>, Ir25a-GAL4/Ir25a<sup>2</sup>; UAS-GFP/+* flies.

(K—M) *ppk23-GAL4/UAS-GFP* flies stained with: (K) anti-GFP and (L) anti-IR25a. (M) Merge of K and L.

(N—P) Labella from *ppk23-GAL4/UAS-nlacZ::GFP* flies stained with: (N) anti- $\beta$ -galactosidase (anti- $\beta$ -gal) and (O) anti-IR25a. (P) Merge of N and O.

(Q and R) Effect of expression of *UAS-hid* under the control of the *ppk23-GAL4* on cell survival in the labella. The indicated flies were stained with anti-GFP. The scale bars represent 25  $\mu$ m.

**Figure S4 (Related to Figure 4)**

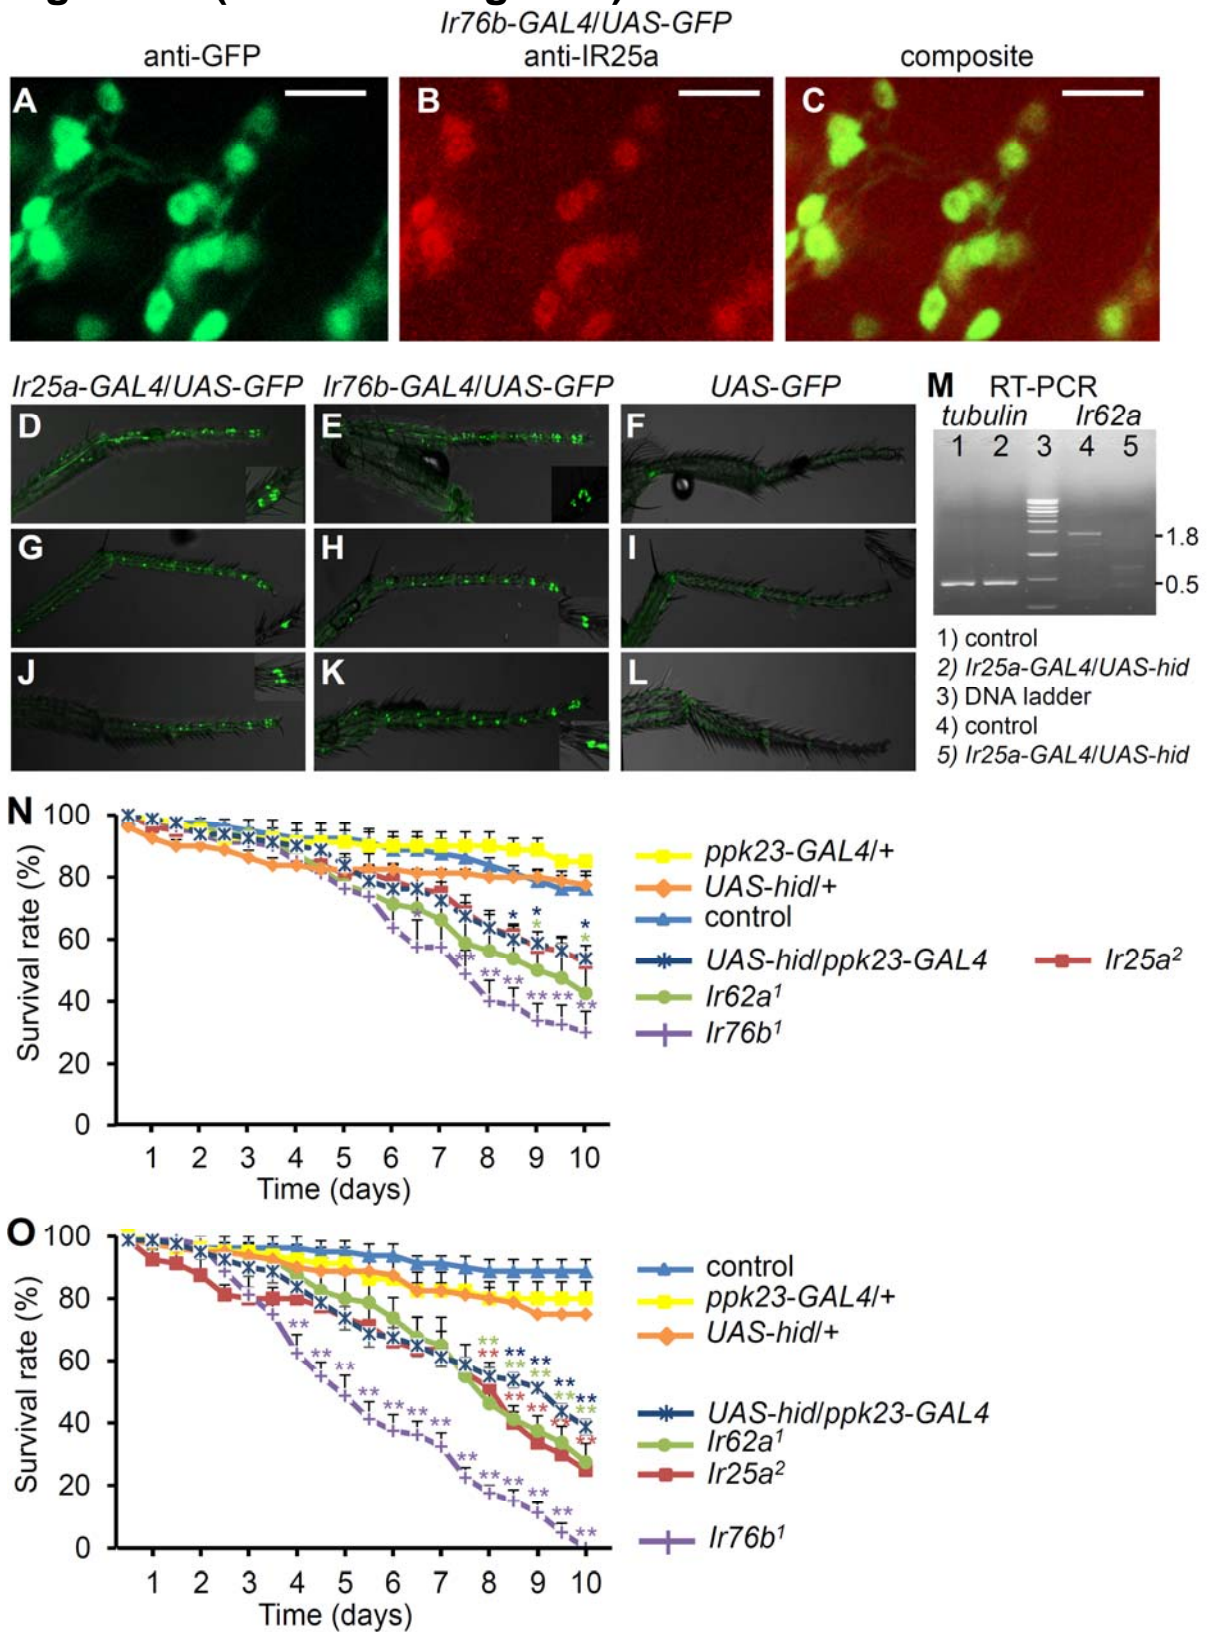

**Figure S4. *Ir* expression in the labellum and legs, and increased lethality of *Ir* mutants in a binary  $\text{Ca}^{2+}$  feeding assay.**

(A—C) Co-localization of the *Ir76b-GAL4* reporters with anti-IR25a. (A) anti-GFP. (B) anti-IR25a. (C) Merged image of A and B.

(D—L) Expression of *UAS-GFP* in the legs under control of the *Ir25a-Gal4*, and *Ir76b-GAL4*. (D—F) Forelegs. (G—I) Mid legs. (J—L) Hind legs.

(M) RT-PCR analyses using RNA isolated from control (*w<sup>1118</sup>*) and *Ir25a-GAL4/UAS-hid* labella. The flies used for the indicated RT-PCR analyses (lanes 1, 2, 4 and 5) are indicated below. *tubulin* served as the control. The DNA ladder (lane 3) was from Enzynomics (DM002). The sizes of the RT-PCR products are indicated to the right in kb.

(N and O) Survival of flies in a food environment in which they were allowed to choose between 100 mM fructose versus: (N) 200 mM fructose and 50 mM  $\text{CaCl}_2$ . n=4. (O) 200 mM fructose and 100 mM  $\text{CaCl}_2$ . n=4. The error bars represent SEMs. The asterisks indicate significant differences from the fructose only feeding (\*\* $P < 0.01$ , \* $P < 0.05$ .) using single factor ANOVA with Scheffe's analysis as a *post hoc* test to compare two sets of data.
